# Supplementary material
Source: PubMed Central journal article supplement (PMC7064153)
Supplement: NIHMS1068647-supplement-Appendix.pdf [file NIHMS1068647-supplement-Appendix.pdf]

## Supplementary Appendix

This appendix has been provided by the authors to give readers additional information about their work.

Supplement to: Casey RM, Harris JB, Ahuka-Mundeke S, et al. Immunogenicity of fractional-dose vaccine during a yellow fever outbreak — final report. *N Engl J Med* 2019;381:444-54. DOI: [10.1056/NEJMoa1710430](https://doi.org/10.1056/NEJMoa1710430)

## Supplementary Material

**Figure S1. Geometric Mean Titer (GMT) at 1 year follow-up in Baseline-Seropositive Participants Stratified by Baseline GMT**

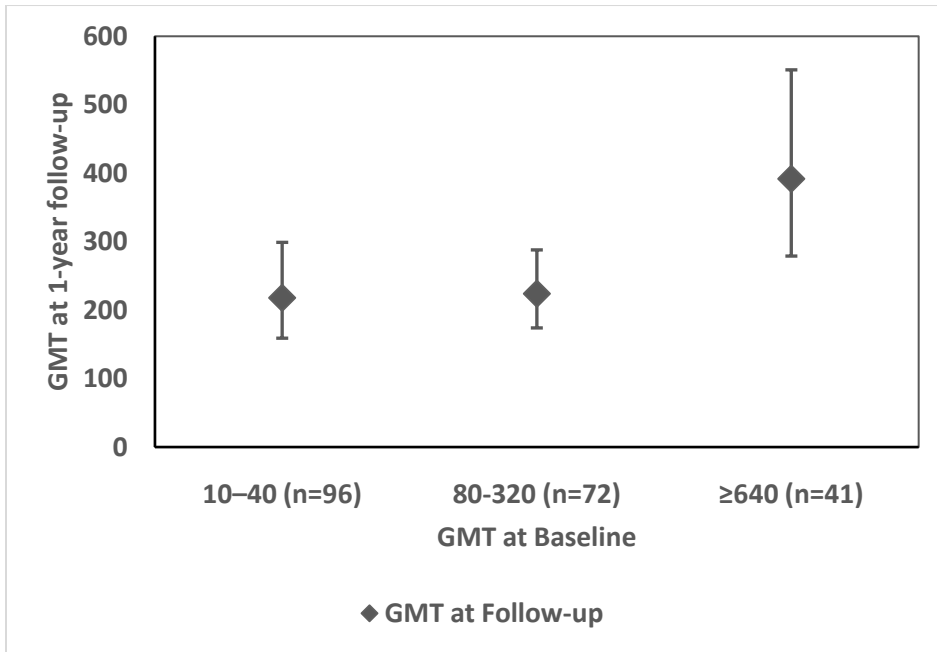

For the following two tables, neutralizing antibody titers were determined using PRNT<sub>90</sub>, which is the reciprocal of the endpoint serum dilution that reduces the challenge virus plaque count by 90%. Reading the PRNT at a 90% cut-off decreases the sensitivity of the test (e.g., miss samples containing lower levels of neutralizing antibodies), but improves the specificity by decreasing the likelihood that low level titers caused by cross-reactive antibodies to other related viruses will be detected. Given these characteristics, PRNT<sub>90</sub> is preferably used for diagnostic purposes. PRNT<sub>50</sub> are more often used in studies or investigations evaluating pre and post vaccination samples as it provides a more accurate result from the linear portion of the titration curve.<sup>1</sup>

| <b>Table S1. Seropositivity Based on PRNT<sub>90</sub> Results at 1 Month and 1 Year, According to Age Group and Sex*</b> |                                                |                   |                |                                               |                  |                |
|---------------------------------------------------------------------------------------------------------------------------|------------------------------------------------|-------------------|----------------|-----------------------------------------------|------------------|----------------|
| <b>Variable</b>                                                                                                           | <b>Seropositivity at 1 Month<br/>(N = 716)</b> |                   | <b>P Value</b> | <b>Seropositivity at 1 Year<br/>(N = 684)</b> |                  | <b>P Value</b> |
|                                                                                                                           | <i>no./total no.</i>                           | <i>% (95% CI)</i> |                | <i>no./total no.</i>                          | <i>%(95% CI)</i> |                |
| All participants                                                                                                          | 699/716                                        | 98 (96–99)        |                | 603/684                                       | 88 (86–90)       |                |
| Age group                                                                                                                 |                                                |                   | 0.08           |                                               |                  | 0.24           |
| 2–5 yr                                                                                                                    | 155/162                                        | 96 (91–98)        |                | 128/151                                       | 85 (78–90)       |                |
| 6–12 yr                                                                                                                   | 188/189                                        | 99 (97–100)       |                | 160/183                                       | 87 (82–91)       |                |
| 13–49 yr                                                                                                                  | 183/189                                        | 97 (93–99)        |                | 169/184                                       | 92 (87–95)       |                |
| ≥50 yr                                                                                                                    | 173/176                                        | 98 (95–99)        |                | 146/166                                       | 88 (82–92)       |                |
| Sex                                                                                                                       |                                                |                   | 0.046          |                                               |                  | 0.34           |
| Male                                                                                                                      | 354/358                                        | 99 (97–100)       |                | 301/346                                       | 87 (83–90)       |                |
| Female                                                                                                                    | 345/358                                        | 96 (94–98)        |                | 302/338                                       | 89 (86–92)       |                |

\* Seropositivity was defined as a result on PRNT<sub>90</sub> testing of 10 or higher. P values for the overall comparisons among the subgroups were calculated with the use of Fisher's exact test at 1 month and Chi-squared test at 1 year.

**Table S2. Geometric Mean Titer (GMT), Seroconversion or Immune Response at 1 Month, and Seropositivity at 1 Year According to Serostatus at Baseline: Results According to PRNT<sub>90</sub> Testing\***

| Variable                        | Baseline GMT<br>(95% CI) | Seroconversion or Immune Response at 1 Month<br>(N = 716) |          |                 | Seropositivity at 1 Year<br>(N = 684) |                              |          |                 |          |
|---------------------------------|--------------------------|-----------------------------------------------------------|----------|-----------------|---------------------------------------|------------------------------|----------|-----------------|----------|
|                                 |                          | no./total no.<br>(%[95% CI])                              | P Value¶ | GMT<br>(95% CI) | P Value¶                              | no./total no.<br>(%[95% CI]) | P Value‡ | GMT<br>(95% CI) | P Value¶ |
| <b>Seronegative at baseline</b> |                          |                                                           |          |                 |                                       |                              |          |                 |          |
| All participants                | NA                       | 531 / 548<br>(97 [95–98])                                 | NA       | 285 (242–337)   | NA                                    | 452 / 527<br>(86 [83–88])    | NA       | 29 (25–34)      | NA       |
| Age group (yr)                  |                          |                                                           | 0.02     |                 | <0.001                                |                              | 0.005    |                 | <0.001   |
| 2–5                             | NA                       | 82 / 89<br>(92 [85–96])                                   |          | 110 (73–166)    |                                       | 62 / 83<br>(75 [64–83])      |          | 13 (9–18)       |          |
| 6–12                            | NA                       | 142 / 143<br>(99 [96–100])^                               |          | 247 (189–324)   |                                       | 117 / 139<br>(84 [77–89])    |          | 23 (17–31)      |          |
| 13–49                           | NA                       | 165 / 171<br>(96 [93–98])                                 |          | 488 (355–671)   |                                       | 152 / 167<br>(91 [86–94])^^  |          | 44 (35–55)      |          |
| ≥50                             | NA                       | 142 / 145<br>(98 [94–99])                                 |          | 314 (230–428)‡  |                                       | 121 / 138<br>(88 [81–92])    |          | 38 (29–51)      |          |
| Sex                             |                          |                                                           | 0.02     |                 | 0.93                                  |                              | 0.24     |                 | 0.19     |
| Male                            |                          | 280 / 284<br>(99 [96–99])                                 |          | 295 (238–366)   |                                       | 232 / 276<br>(84 [79–88])    |          | 27 (22–33)      |          |
| Female                          | -----                    | 251 / 264<br>(95 [92–97])                                 |          | 275 (214–355)   |                                       | 220 / 251<br>(88 [83–91])    |          | 33 (27–40)      |          |
| <b>Seropositive at baseline</b> |                          |                                                           |          |                 |                                       |                              |          |                 |          |
| All participants                | 48 (39–59)               | 95 / 168<br>(57 [49–64])                                  | NA       | 302 (242–378)   | NA                                    | 151 / 157<br>(96 [92–98])    | NA       | 57 (46–70)      | NA       |
| Age group (yr)                  |                          |                                                           | <0.001   |                 | 0.27                                  |                              | 0.29     |                 | 0.82     |
| 2–5                             | 37 (29–48)               | 47 / 73<br>(64 [53–74])                                   |          | 314 (221–446)   |                                       | 66 / 68<br>(97 [90–99])      |          | 60 (44–81)      |          |
| 6–12                            | 38 (27–53)               | 35 / 46<br>(76 [62–86])                                   |          | 345 (236–504)   |                                       | 43 / 44<br>(98 [88–100])     |          | 61 (42–88)      |          |
| 13–49                           | 122 (61–244)             | 6 / 18<br>(33 [16–56])                                    |          | 346 (189–631)   |                                       | 17 / 17<br>(100 [82–100])    |          | 53 (29–97)      |          |
| ≥50                             | 70 (37–133)              | 7 / 31<br>(23 [11–40])¥                                   |          | 209 (109–402)   |                                       | 25 / 28<br>(89 [73–96])      |          | 46 (22–98)      |          |
| Sex                             |                          |                                                           | 0.37     |                 | 0.27                                  |                              | 0.23     |                 | 0.90     |

|        |            |                         |               |                          |            |
|--------|------------|-------------------------|---------------|--------------------------|------------|
| Male   | 39 (29–52) | 45 / 74<br>(61 [49–71]) | 342 (248–472) | 69 / 70<br>(99 [92–100]) | 59 (44–78) |
| Female | 56 (42–74) | 50 / 94<br>(53 [43–63]) | 274 (200–375) | 82 / 87<br>(94 [87–98])  | 55 (40–76) |

\* Seropositivity was defined as a result on PRNT<sub>90</sub> testing of 10 or higher. Note: Fifty-five participants were seronegative at baseline using a PRNT<sub>90</sub> but were seropositive at baseline using a PRNT<sub>50</sub>. NA denotes not applicable

¶ P values for the differences in seroconversion at 1-month follow-up were calculated using Fisher's exact test. P values for the differences in immune response at 1 month were calculated using the Cochran-Mantel-Haenszel test, adjusting for baseline titer.

¶¶ P values for the global test of differences in the GMT at follow-up were calculated with the Kruskal Wallis test (age group) and the Wilcoxon rank-sum test (sex)

‡ P values for the differences in seropositivity at 1 year were calculated using the Chi-square test (for baseline seronegative participants) and Fisher's exact test (for baseline seropositive participants)

^ Significantly more likely to demonstrate an immune response compared to 2–5 year age group (Fisher's exact test using the Bonferroni correction with adjusted alpha = 0.0083)

^^ Significantly more likely to demonstrate an immune response compared to 2–5 year age group (Chi Square test using the Bonferroni correction with adjusted alpha = 0.0083)

¥ Significantly less likely to demonstrate an immune response compared to 2–5 year and 6–12 year age groups (Cochran-Mantel-Haensel test adjusted for baseline titer and using the Bonferroni correction with adjusted alpha = 0.0083)

‡ Significantly higher titers than 2-5 year age group (Wilcoxon rank-sum test using the Bonferroni correction with adjusted alpha = 0.0083)

|| Significantly higher titers than 2-5 year and 6-12 year age group (Wilcoxon rank-sum test using the Bonferroni correction with adjusted alpha = 0.0083)

## Reference

1. WHO 2007 Guidelines for plaque reduction neutralization testing of human antibodies to dengue viruses. Available at: [https://apps.who.int/iris/bitstream/handle/10665/69687/who\\_ivb\\_07.07\\_eng.pdf;jsessionid=19BF765D9B3FDAD85EF3F217B0165953?sequence=1](https://apps.who.int/iris/bitstream/handle/10665/69687/who_ivb_07.07_eng.pdf;jsessionid=19BF765D9B3FDAD85EF3F217B0165953?sequence=1). Accessed on 6 February 2019.
